# Supplementary material for: Microbial Diversity and Potential Pathogens in Ornamental Fish Aquarium Water
Source: PLoS One. 2012 Sep 6;7(9):e39971. doi: 10.1371/journal.pone.0039971 (PMC3435374; doi:10.1371/journal.pone.0039971)
Supplement: Table S4 — MIMARKS table of associated sample metadata. (XLSX) [file pone.0039971.s004.xlsx]

## Sheet: MIENS complient table
GROUP	Variable Name	Units	A1	A2	D1	D2	E1	E2
mimarks_investigation	experimental_factor	Alphanumeric	Store	Store	Store	Store	Store	Store
mimarks_investigation	investigation_type	Alphanumeric	MIMARKS survey	MIMARKS survey	MIMARKS survey	MIMARKS survey	MIMARKS survey	MIMARKS survey	MIMARKS survey
mimarks_investigation	project_name	Alphanumeric	Pathogen pollution in the pet trade	Pathogen pollution in the pet trade	Pathogen pollution in the pet trade	Pathogen pollution in the pet trade	Pathogen pollution in the pet trade	Pathogen pollution in the pet trade
mimarks_investigation	sample_type	Alphanumeric	water	water	water	water	water	water
mimarks_investigation	submit_to_insdc	Alphanumeric	SRP013874	SRP013874	SRP013874	SRP013874	SRP013874	SRP013874
mimarks_environment	collection_date	YYYY-MM-DDThh:mm:ss+/-NN	2009-12-09	2009-12-09	2009-12-09	2009-12-09	2009-12-09	2009-12-09
mimarks_environment	country	Alphanumeric	USA	USA	USA	USA	USA	USA
mimarks_environment	environment	Alphanumeric	fish tank	fish tank	fish tank	fish tank	fish tank	fish tank
mimarks_environment	envo_biome	Alphanumeric	aquatic biome	aquatic biome	aquatic biome	aquatic biome	aquatic biome	aquatic biome
mimarks_environment	envo_feature	Alphanumeric	anthropogenic feature	anthropogenic feature	anthropogenic feature	anthropogenic feature	anthropogenic feature	anthropogenic feature
mimarks_environment	envo_material	Alphanumeric	fresh water	fresh water	fresh water	fresh water	fresh water	fresh water
mimarks_environment	habitat	Alphanumeric	man-made	man-made	man-made	man-made	man-made	man-made
mimarks_environment	lat_lon	+/-decimalDegree+/-decimalDegree	+41.8-71.4	+41.8-71.4	+41.8-71.4	+41.8-71.4	+41.8-71.4	+41.8-71.4
mimarks_extension	env_package	Alphanumeric	water	water	water	water	water	water
mimarks_nucleic_acid_sequence_source	samp_collect_device	Alphanumeric	0.2 micron sterivex	0.2 micron sterivex	0.2 micron sterivex	0.2 micron sterivex	0.2 micron sterivex	0.2 micron sterivex
mimarks_nucleic_acid_sequence_source	samp_size	liter	0.6	0.6	0.6	0.6	0.6	0.6
mimarks_sequencing	bac_lib_reads_seqd	integer_count	9993	13015	11368	8332	14233	16171
mimarks_sequencing	bac_multiplex_ident_1	Alphanumeric	CACAC	AGAGC	GTGAG	GCGTG	GCACG	GAGCG
mimarks_sequencing	domain	Alphanumeric	Bacteria	Bacteria	Bacteria	Bacteria	Bacteria	Bacteria
mimarks_sequencing	nucl_acid_ext	Alphanumeric	http://vamps.mbl.edu/	http://vamps.mbl.edu/	http://vamps.mbl.edu/	http://vamps.mbl.edu/	http://vamps.mbl.edu/	http://vamps.mbl.edu/
mimarks_sequencing	pcr_cond	Alphanumeric	initial denaturation:94degC_4min;denaturation:94degC_45sec;annealing:55degC_45sec;elongation:72degC_1min;final elongation:72degC_10 min;30 cycles	initial denaturation:94degC_4min;denaturation:94degC_45sec;annealing:55degC_45sec;elongation:72degC_1min;final elongation:72degC_10 min;30 cycles	initial denaturation:94degC_4min;denaturation:94degC_45sec;annealing:55degC_45sec;elongation:72degC_1min;final elongation:72degC_10 min;30 cycles	initial denaturation:94degC_4min;denaturation:94degC_45sec;annealing:55degC_45sec;elongation:72degC_1min;final elongation:72degC_10 min;30 cycles	initial denaturation:94degC_4min;denaturation:94degC_45sec;annealing:55degC_45sec;elongation:72degC_1min;final elongation:72degC_10 min;30 cycles	initial denaturation:94degC_4min;denaturation:94degC_45sec;annealing:55degC_45sec;elongation:72degC_1min;final elongation:72degC_10 min;30 cycles			initial denaturation:94degC_4min;denaturation:94degC_45sec;annealing:55degC_45sec;elongation:72degC_1min;final elongation:72degC_10 min;30 cycles
mimarks_sequencing	pcr_primers	Alphanumeric	341F2:CCTACGGGNGGCWGCAG; 341F2:TCTACGGAAGGCTGCAG; 925R1:CCGTCAATTCNTTTRAGT 926R3:CCGTCAATTTCTTTGAGT 926R4: CCGTCTATTCCTTTGANT	341F2:CCTACGGGNGGCWGCAG; 341F2:TCTACGGAAGGCTGCAG; 925R1:CCGTCAATTCNTTTRAGT 926R3:CCGTCAATTTCTTTGAGT 926R4: CCGTCTATTCCTTTGANT	341F2:CCTACGGGNGGCWGCAG; 341F2:TCTACGGAAGGCTGCAG; 925R1:CCGTCAATTCNTTTRAGT 926R3:CCGTCAATTTCTTTGAGT 926R4: CCGTCTATTCCTTTGANT	341F2:CCTACGGGNGGCWGCAG; 341F2:TCTACGGAAGGCTGCAG; 925R1:CCGTCAATTCNTTTRAGT 926R3:CCGTCAATTTCTTTGAGT 926R4: CCGTCTATTCCTTTGANT	341F2:CCTACGGGNGGCWGCAG; 341F2:TCTACGGAAGGCTGCAG; 925R1:CCGTCAATTCNTTTRAGT 926R3:CCGTCAATTTCTTTGAGT 926R4: CCGTCTATTCCTTTGANT	341F2:CCTACGGGNGGCWGCAG; 341F2:TCTACGGAAGGCTGCAG; 925R1:CCGTCAATTCNTTTRAGT 926R3:CCGTCAATTTCTTTGAGT 926R4: CCGTCTATTCCTTTGANT
mimarks_sequencing	seq_quality_check	Alphanumeric	VAMPS	VAMPS	VAMPS	VAMPS	VAMPS	VAMPS
mimarks_sequencing	sequencing_meth	Alphanumeric	GS FLX LR70 454 pyrosequencing	GS FLX LR70 454 pyrosequencing	GS FLX LR70 454 pyrosequencing	GS FLX LR70 454 pyrosequencing	GS FLX LR70 454 pyrosequencing	GS FLX LR70 454 pyrosequencing
mimarks_sequencing	sop	Alphanumeric	MBL-BPC	MBL-BPC	MBL-BPC	MBL-BPC	MBL-BPC	MBL-BPC
mimarks_sequencing	target_gene	Alphanumeric	16S rRNA	16S rRNA	16S rRNA	16S rRNA	16S rRNA	16S rRNA
mimarks_sequencing	target_subfragment	Alphanumeric	V3-V5	V3-V5	V3-V5	V3-V5	V3-V5	V3-V5
